# Supplementary material
Source: PubMed Central journal article supplement (PMC8359592)
Supplement: 12913_2021_6783_MOESM2_ESM.pdf [file 12913_2021_6783_MOESM2_ESM.pdf]

**PACT Teamlet Member Virtual Medical Modality Survey**

**(Sub-Scale 1) Virtual Medical Modality Tool Use Count**

1. As a PACT member, which of the following virtual care tools have you used with patients?

**(Check all that apply)**

- Rx Refill (New Rx, Refill, Renewal)
- VA wellness reminders
- VA appointments and email reminders
- VA test results
- Blue Button
- Secure Messaging
- VA allergies and adverse reactions
- HealthLiving Assessments
- Veterans Health Library
- Telehealth
- VetLink Kiosks
- Mobile Applications
- Other: \_\_\_\_\_
- Does not apply to me

2. If applicable, please list the mobile applications you have recommended to patients.

|  |  |
|--|--|
|  |  |
|  |  |
|  |  |
|  |  |

**(Sub-Scale 2) Virtual Medical Modality Tool Use**

3. As a PACT member, how long have you been using virtual care tools (see question 1 for examples)?

- Less than six months
- Six months to a year
- 1-2 years
- 3-5 years
- More than 5 years
- Does not apply to me

4. As a PACT member, how often do you use the virtual care tools (see question 1 for examples) to provide care?
- Everyday
  - Few times a week
  - Once a week
  - Few times a month
  - Once a month
  - Few times a year
  - Never
  - Does not apply to me

**(Sub-Scale 3) Patient Virtual Medical Modality Tool Use Count**

5. In general, what are your patients' preferred methods of communication and information exchange? **(Check all that apply)**
- Telephone
  - Face-to-face
  - My HealthVet
  - Secure Messaging
  - Telehealth
  - VetLink Kiosks
  - Mobile Applications
6. I promote patients' use of the following virtual care tools. **(Check all that apply)**
- Rx Refill (New Rx, Refill, Renewal)
  - VA wellness reminders
  - VA appointments and email reminders
  - VA test results
  - Blue Button
  - Secure Messaging
  - VA allergies and adverse reactions
  - HealthLiving Assessments
  - Veterans Health Library
  - Telehealth
  - VetLink Kiosks
  - Mobile Applications
  - Other: \_\_\_\_\_
  - Does not apply to me

## Virtual Care Tool Use

**As a PACT member, please answer the following questions about your use of virtual care tools with patients.**

7. Have you used or promoted the use of the following virtual care tools with your patients?

|                                                                                                                                                                                                                                                       | Yes                      | No, someone<br>else<br>corresponds on<br>my behalf | No                       | I Don't<br>Know          |
|-------------------------------------------------------------------------------------------------------------------------------------------------------------------------------------------------------------------------------------------------------|--------------------------|----------------------------------------------------|--------------------------|--------------------------|
| a. My HealtheVet, including Rx Refill, VA wellness reminders, VA appointments and email reminders, VA test results, Blue Button, VA allergies and adverse reactions, HealtheLiving Assessments, Veterans Health Library (other than Secure Messaging) | <input type="checkbox"/> | <input type="checkbox"/>                           | <input type="checkbox"/> | <input type="checkbox"/> |
| b. Secure Messaging                                                                                                                                                                                                                                   | <input type="checkbox"/> | <input type="checkbox"/>                           | <input type="checkbox"/> | <input type="checkbox"/> |
| c. Telehealth Services                                                                                                                                                                                                                                | <input type="checkbox"/> | <input type="checkbox"/>                           | <input type="checkbox"/> | <input type="checkbox"/> |
| d. VetLink Kiosks                                                                                                                                                                                                                                     | <input type="checkbox"/> | <input type="checkbox"/>                           | <input type="checkbox"/> | <input type="checkbox"/> |
| e. Mobile Applications                                                                                                                                                                                                                                | <input type="checkbox"/> | <input type="checkbox"/>                           | <input type="checkbox"/> | <input type="checkbox"/> |

8. With what percentage of patients do you use and/or promote the following virtual care tools?

|                                                                                                                                                                                                                                                       | 0%                       | 1%-25%                   | 26%-50%                  | 51%-75%                  | 76%-100%                 | Does<br>not<br>apply     |
|-------------------------------------------------------------------------------------------------------------------------------------------------------------------------------------------------------------------------------------------------------|--------------------------|--------------------------|--------------------------|--------------------------|--------------------------|--------------------------|
| a. My HealtheVet, including Rx Refill, VA wellness reminders, VA appointments and email reminders, VA test results, Blue Button, VA allergies and adverse reactions, HealtheLiving Assessments, Veterans Health Library (other than Secure Messaging) | <input type="checkbox"/> | <input type="checkbox"/> | <input type="checkbox"/> | <input type="checkbox"/> | <input type="checkbox"/> | <input type="checkbox"/> |
| b. Secure Messaging                                                                                                                                                                                                                                   | <input type="checkbox"/> | <input type="checkbox"/> | <input type="checkbox"/> | <input type="checkbox"/> | <input type="checkbox"/> | <input type="checkbox"/> |
| c. Telehealth Services                                                                                                                                                                                                                                | <input type="checkbox"/> | <input type="checkbox"/> | <input type="checkbox"/> | <input type="checkbox"/> | <input type="checkbox"/> | <input type="checkbox"/> |
| d. VetLink Kiosks                                                                                                                                                                                                                                     | <input type="checkbox"/> | <input type="checkbox"/> | <input type="checkbox"/> | <input type="checkbox"/> | <input type="checkbox"/> | <input type="checkbox"/> |
| e. Mobile Applications                                                                                                                                                                                                                                | <input type="checkbox"/> | <input type="checkbox"/> | <input type="checkbox"/> | <input type="checkbox"/> | <input type="checkbox"/> | <input type="checkbox"/> |

**As a PACT member, please indicate the extent to which you agree with the following statements.**

**(Sub-Scale 4) Relative Advantage**

9. I think using and/or referring the following virtual care tool(s) with/to patients improves care delivery.

|                                                                                                                                                                                                                                                      | Strongly Agree           | Agree                    | Neutral                  | Disagree                 | Strongly Disagree        | Does not apply           |
|------------------------------------------------------------------------------------------------------------------------------------------------------------------------------------------------------------------------------------------------------|--------------------------|--------------------------|--------------------------|--------------------------|--------------------------|--------------------------|
| a. My HealtheVet, including Rx Refill, VA wellness reminders, VA appointments and email reminders, VA test results, Blue Button, VA allergies and adverse reactions, HealthLiving Assessments, Veterans Health Library (other than Secure Messaging) | <input type="checkbox"/> | <input type="checkbox"/> | <input type="checkbox"/> | <input type="checkbox"/> | <input type="checkbox"/> | <input type="checkbox"/> |
| b. Secure Messaging                                                                                                                                                                                                                                  | <input type="checkbox"/> | <input type="checkbox"/> | <input type="checkbox"/> | <input type="checkbox"/> | <input type="checkbox"/> | <input type="checkbox"/> |
| c. Telehealth Services                                                                                                                                                                                                                               | <input type="checkbox"/> | <input type="checkbox"/> | <input type="checkbox"/> | <input type="checkbox"/> | <input type="checkbox"/> | <input type="checkbox"/> |
| d. VetLink Kiosks                                                                                                                                                                                                                                    | <input type="checkbox"/> | <input type="checkbox"/> | <input type="checkbox"/> | <input type="checkbox"/> | <input type="checkbox"/> | <input type="checkbox"/> |
| e. Mobile Applications                                                                                                                                                                                                                               | <input type="checkbox"/> | <input type="checkbox"/> | <input type="checkbox"/> | <input type="checkbox"/> | <input type="checkbox"/> | <input type="checkbox"/> |

10. I prefer using the following virtual care tool(s) over other traditional tools (face-to-face encounters, phone, postal mail etc.).

|                                                                                                                                                                                                                                                      | Strongly Agree           | Agree                    | Neutral                  | Disagree                 | Strongly Disagree        | Does not apply           |
|------------------------------------------------------------------------------------------------------------------------------------------------------------------------------------------------------------------------------------------------------|--------------------------|--------------------------|--------------------------|--------------------------|--------------------------|--------------------------|
| a. My HealtheVet, including Rx Refill, VA wellness reminders, VA appointments and email reminders, VA test results, Blue Button, VA allergies and adverse reactions, HealthLiving Assessments, Veterans Health Library (other than Secure Messaging) | <input type="checkbox"/> | <input type="checkbox"/> | <input type="checkbox"/> | <input type="checkbox"/> | <input type="checkbox"/> | <input type="checkbox"/> |
| b. Secure Messaging                                                                                                                                                                                                                                  | <input type="checkbox"/> | <input type="checkbox"/> | <input type="checkbox"/> | <input type="checkbox"/> | <input type="checkbox"/> | <input type="checkbox"/> |
| c. Telehealth Services                                                                                                                                                                                                                               | <input type="checkbox"/> | <input type="checkbox"/> | <input type="checkbox"/> | <input type="checkbox"/> | <input type="checkbox"/> | <input type="checkbox"/> |
| d. VetLink Kiosks                                                                                                                                                                                                                                    | <input type="checkbox"/> | <input type="checkbox"/> | <input type="checkbox"/> | <input type="checkbox"/> | <input type="checkbox"/> | <input type="checkbox"/> |
| e. Mobile Applications                                                                                                                                                                                                                               | <input type="checkbox"/> | <input type="checkbox"/> | <input type="checkbox"/> | <input type="checkbox"/> | <input type="checkbox"/> | <input type="checkbox"/> |

**(Sub-Scale 5) Observability**

11. When PACT members use the following virtual care tool(s) their clinical workflow improves.

|                                                                                                                                                                                                                                                      | Strongly Agree           | Agree                    | Neutral                  | Disagree                 | Strongly Disagree        | Does not apply           |
|------------------------------------------------------------------------------------------------------------------------------------------------------------------------------------------------------------------------------------------------------|--------------------------|--------------------------|--------------------------|--------------------------|--------------------------|--------------------------|
| a. My HealtheVet, including Rx Refill, VA wellness reminders, VA appointments and email reminders, VA test results, Blue Button, VA allergies and adverse reactions, HealthLiving Assessments, Veterans Health Library (other than Secure Messaging) | <input type="checkbox"/> | <input type="checkbox"/> | <input type="checkbox"/> | <input type="checkbox"/> | <input type="checkbox"/> | <input type="checkbox"/> |
| b. Secure Messaging                                                                                                                                                                                                                                  | <input type="checkbox"/> | <input type="checkbox"/> | <input type="checkbox"/> | <input type="checkbox"/> | <input type="checkbox"/> | <input type="checkbox"/> |
| c. Telehealth Services                                                                                                                                                                                                                               | <input type="checkbox"/> | <input type="checkbox"/> | <input type="checkbox"/> | <input type="checkbox"/> | <input type="checkbox"/> | <input type="checkbox"/> |
| d. VetLink Kiosks                                                                                                                                                                                                                                    | <input type="checkbox"/> | <input type="checkbox"/> | <input type="checkbox"/> | <input type="checkbox"/> | <input type="checkbox"/> | <input type="checkbox"/> |
| e. Mobile Applications                                                                                                                                                                                                                               | <input type="checkbox"/> | <input type="checkbox"/> | <input type="checkbox"/> | <input type="checkbox"/> | <input type="checkbox"/> | <input type="checkbox"/> |

12. When PACT members use the following virtual care tool(s) patient outcomes improve.

|                                                                                                                                                                                                                                                      | Strongly Agree           | Agree                    | Neutral                  | Disagree                 | Strongly Disagree        | Does not apply           |
|------------------------------------------------------------------------------------------------------------------------------------------------------------------------------------------------------------------------------------------------------|--------------------------|--------------------------|--------------------------|--------------------------|--------------------------|--------------------------|
| a. My HealtheVet, including Rx Refill, VA wellness reminders, VA appointments and email reminders, VA test results, Blue Button, VA allergies and adverse reactions, HealthLiving Assessments, Veterans Health Library (other than Secure Messaging) | <input type="checkbox"/> | <input type="checkbox"/> | <input type="checkbox"/> | <input type="checkbox"/> | <input type="checkbox"/> | <input type="checkbox"/> |
| b. Secure Messaging                                                                                                                                                                                                                                  | <input type="checkbox"/> | <input type="checkbox"/> | <input type="checkbox"/> | <input type="checkbox"/> | <input type="checkbox"/> | <input type="checkbox"/> |
| c. Telehealth Services                                                                                                                                                                                                                               | <input type="checkbox"/> | <input type="checkbox"/> | <input type="checkbox"/> | <input type="checkbox"/> | <input type="checkbox"/> | <input type="checkbox"/> |
| d. VetLink Kiosks                                                                                                                                                                                                                                    | <input type="checkbox"/> | <input type="checkbox"/> | <input type="checkbox"/> | <input type="checkbox"/> | <input type="checkbox"/> | <input type="checkbox"/> |
| e. Mobile Applications                                                                                                                                                                                                                               | <input type="checkbox"/> | <input type="checkbox"/> | <input type="checkbox"/> | <input type="checkbox"/> | <input type="checkbox"/> | <input type="checkbox"/> |

**(Sub-Scale 6) Compatibility**

13. I am comfortable using the following virtual care tool(s) to communicate with and deliver care to patients.

|                                                                                                                                                                                                                                                       | Strongly Agree           | Agree                    | Neutral                  | Disagree                 | Strongly Disagree        | Does not apply           |
|-------------------------------------------------------------------------------------------------------------------------------------------------------------------------------------------------------------------------------------------------------|--------------------------|--------------------------|--------------------------|--------------------------|--------------------------|--------------------------|
| a. My HealtheVet, including Rx Refill, VA wellness reminders, VA appointments and email reminders, VA test results, Blue Button, VA allergies and adverse reactions, HealtheLiving Assessments, Veterans Health Library (other than Secure Messaging) | <input type="checkbox"/> | <input type="checkbox"/> | <input type="checkbox"/> | <input type="checkbox"/> | <input type="checkbox"/> | <input type="checkbox"/> |
| b. Secure Messaging                                                                                                                                                                                                                                   | <input type="checkbox"/> | <input type="checkbox"/> | <input type="checkbox"/> | <input type="checkbox"/> | <input type="checkbox"/> | <input type="checkbox"/> |
| c. Telehealth Services                                                                                                                                                                                                                                | <input type="checkbox"/> | <input type="checkbox"/> | <input type="checkbox"/> | <input type="checkbox"/> | <input type="checkbox"/> | <input type="checkbox"/> |
| d. VetLink Kiosks                                                                                                                                                                                                                                     | <input type="checkbox"/> | <input type="checkbox"/> | <input type="checkbox"/> | <input type="checkbox"/> | <input type="checkbox"/> | <input type="checkbox"/> |
| e. Mobile Applications                                                                                                                                                                                                                                | <input type="checkbox"/> | <input type="checkbox"/> | <input type="checkbox"/> | <input type="checkbox"/> | <input type="checkbox"/> | <input type="checkbox"/> |

**(Sub-Scale 7) Complexity**

14. PACT members would benefit from education on how to access and the following virtual care tool(s) with patients.

|                                                                                                                                                                                                                                                       | Strongly Agree           | Agree                    | Neutral                  | Disagree                 | Strongly Disagree        | Does not apply           |
|-------------------------------------------------------------------------------------------------------------------------------------------------------------------------------------------------------------------------------------------------------|--------------------------|--------------------------|--------------------------|--------------------------|--------------------------|--------------------------|
| a. My HealtheVet, including Rx Refill, VA wellness reminders, VA appointments and email reminders, VA test results, Blue Button, VA allergies and adverse reactions, HealtheLiving Assessments, Veterans Health Library (other than Secure Messaging) | <input type="checkbox"/> | <input type="checkbox"/> | <input type="checkbox"/> | <input type="checkbox"/> | <input type="checkbox"/> | <input type="checkbox"/> |
| b. Secure Messaging                                                                                                                                                                                                                                   | <input type="checkbox"/> | <input type="checkbox"/> | <input type="checkbox"/> | <input type="checkbox"/> | <input type="checkbox"/> | <input type="checkbox"/> |
| c. Telehealth Services                                                                                                                                                                                                                                | <input type="checkbox"/> | <input type="checkbox"/> | <input type="checkbox"/> | <input type="checkbox"/> | <input type="checkbox"/> | <input type="checkbox"/> |
| d. VetLink Kiosks                                                                                                                                                                                                                                     | <input type="checkbox"/> | <input type="checkbox"/> | <input type="checkbox"/> | <input type="checkbox"/> | <input type="checkbox"/> | <input type="checkbox"/> |
| e. Mobile Applications                                                                                                                                                                                                                                | <input type="checkbox"/> | <input type="checkbox"/> | <input type="checkbox"/> | <input type="checkbox"/> | <input type="checkbox"/> | <input type="checkbox"/> |

15. It is easy for me to integrate the use of the following virtual care tool(s) into patient care delivery.

|                                                                                                                                                                                                                                                       | Strongly Agree           | Agree                    | Neutral                  | Disagree                 | Strongly Disagree        | Does not apply           |
|-------------------------------------------------------------------------------------------------------------------------------------------------------------------------------------------------------------------------------------------------------|--------------------------|--------------------------|--------------------------|--------------------------|--------------------------|--------------------------|
| a. My HealtheVet, including Rx Refill, VA wellness reminders, VA appointments and email reminders, VA test results, Blue Button, VA allergies and adverse reactions, HealtheLiving Assessments, Veterans Health Library (other than Secure Messaging) | <input type="checkbox"/> | <input type="checkbox"/> | <input type="checkbox"/> | <input type="checkbox"/> | <input type="checkbox"/> | <input type="checkbox"/> |
| b. Secure Messaging                                                                                                                                                                                                                                   | <input type="checkbox"/> | <input type="checkbox"/> | <input type="checkbox"/> | <input type="checkbox"/> | <input type="checkbox"/> | <input type="checkbox"/> |
| c. Telehealth Services                                                                                                                                                                                                                                | <input type="checkbox"/> | <input type="checkbox"/> | <input type="checkbox"/> | <input type="checkbox"/> | <input type="checkbox"/> | <input type="checkbox"/> |
| d. VetLink Kiosks                                                                                                                                                                                                                                     | <input type="checkbox"/> | <input type="checkbox"/> | <input type="checkbox"/> | <input type="checkbox"/> | <input type="checkbox"/> | <input type="checkbox"/> |
| e. Mobile Applications                                                                                                                                                                                                                                | <input type="checkbox"/> | <input type="checkbox"/> | <input type="checkbox"/> | <input type="checkbox"/> | <input type="checkbox"/> | <input type="checkbox"/> |

**(Sub-Scale 8) Context and Facilitation**

16. Using virtual care tool(s) at work reflects my PACT role responsibilities.

|                                                                                                                                                                                                                                                       | Strongly Agree           | Agree                    | Neutral                  | Disagree                 | Strongly Disagree        | Does not apply           |
|-------------------------------------------------------------------------------------------------------------------------------------------------------------------------------------------------------------------------------------------------------|--------------------------|--------------------------|--------------------------|--------------------------|--------------------------|--------------------------|
| a. My HealtheVet, including Rx Refill, VA wellness reminders, VA appointments and email reminders, VA test results, Blue Button, VA allergies and adverse reactions, HealtheLiving Assessments, Veterans Health Library (other than Secure Messaging) | <input type="checkbox"/> | <input type="checkbox"/> | <input type="checkbox"/> | <input type="checkbox"/> | <input type="checkbox"/> | <input type="checkbox"/> |
| b. Secure Messaging                                                                                                                                                                                                                                   | <input type="checkbox"/> | <input type="checkbox"/> | <input type="checkbox"/> | <input type="checkbox"/> | <input type="checkbox"/> | <input type="checkbox"/> |
| c. Telehealth Services                                                                                                                                                                                                                                | <input type="checkbox"/> | <input type="checkbox"/> | <input type="checkbox"/> | <input type="checkbox"/> | <input type="checkbox"/> | <input type="checkbox"/> |
| d. VetLink Kiosks                                                                                                                                                                                                                                     | <input type="checkbox"/> | <input type="checkbox"/> | <input type="checkbox"/> | <input type="checkbox"/> | <input type="checkbox"/> | <input type="checkbox"/> |
| e. Mobile Applications                                                                                                                                                                                                                                | <input type="checkbox"/> | <input type="checkbox"/> | <input type="checkbox"/> | <input type="checkbox"/> | <input type="checkbox"/> | <input type="checkbox"/> |

17. My use of virtual care tool(s) is reinforced in my workplace.

|                                                                                                                                                                                                                                                       | Strongly Agree           | Agree                    | Neutral                  | Disagree                 | Strongly Disagree        | Does not apply           |
|-------------------------------------------------------------------------------------------------------------------------------------------------------------------------------------------------------------------------------------------------------|--------------------------|--------------------------|--------------------------|--------------------------|--------------------------|--------------------------|
| a. My HealtheVet, including Rx Refill, VA wellness reminders, VA appointments and email reminders, VA test results, Blue Button, VA allergies and adverse reactions, HealtheLiving Assessments, Veterans Health Library (other than Secure Messaging) | <input type="checkbox"/> | <input type="checkbox"/> | <input type="checkbox"/> | <input type="checkbox"/> | <input type="checkbox"/> | <input type="checkbox"/> |
| b. Secure Messaging                                                                                                                                                                                                                                   | <input type="checkbox"/> | <input type="checkbox"/> | <input type="checkbox"/> | <input type="checkbox"/> | <input type="checkbox"/> | <input type="checkbox"/> |
| c. Telehealth Services                                                                                                                                                                                                                                | <input type="checkbox"/> | <input type="checkbox"/> | <input type="checkbox"/> | <input type="checkbox"/> | <input type="checkbox"/> | <input type="checkbox"/> |
| d. VetLink Kiosks                                                                                                                                                                                                                                     | <input type="checkbox"/> | <input type="checkbox"/> | <input type="checkbox"/> | <input type="checkbox"/> | <input type="checkbox"/> | <input type="checkbox"/> |
| e. Mobile Applications                                                                                                                                                                                                                                | <input type="checkbox"/> | <input type="checkbox"/> | <input type="checkbox"/> | <input type="checkbox"/> | <input type="checkbox"/> | <input type="checkbox"/> |

18. I intend to use and/or refer patients to use the following virtual care tool(s) in the future when providing care.

|                                                                                                                                                                                                                                                      | Strongly Agree           | Agree                    | Neutral                  | Disagree                 | Strongly Disagree        | Does not apply           |
|------------------------------------------------------------------------------------------------------------------------------------------------------------------------------------------------------------------------------------------------------|--------------------------|--------------------------|--------------------------|--------------------------|--------------------------|--------------------------|
| a. My HealtheVet, including Rx Refill, VA wellness reminders, VA appointments and email reminders, VA test results, Blue Button, VA allergies and adverse reactions, HealthLiving Assessments, Veterans Health Library (other than Secure Messaging) | <input type="checkbox"/> | <input type="checkbox"/> | <input type="checkbox"/> | <input type="checkbox"/> | <input type="checkbox"/> | <input type="checkbox"/> |
| b. Secure Messaging                                                                                                                                                                                                                                  | <input type="checkbox"/> | <input type="checkbox"/> | <input type="checkbox"/> | <input type="checkbox"/> | <input type="checkbox"/> | <input type="checkbox"/> |
| c. Telehealth Services                                                                                                                                                                                                                               | <input type="checkbox"/> | <input type="checkbox"/> | <input type="checkbox"/> | <input type="checkbox"/> | <input type="checkbox"/> | <input type="checkbox"/> |
| d. VetLink Kiosks                                                                                                                                                                                                                                    | <input type="checkbox"/> | <input type="checkbox"/> | <input type="checkbox"/> | <input type="checkbox"/> | <input type="checkbox"/> | <input type="checkbox"/> |
| e. Mobile Applications                                                                                                                                                                                                                               | <input type="checkbox"/> | <input type="checkbox"/> | <input type="checkbox"/> | <input type="checkbox"/> | <input type="checkbox"/> | <input type="checkbox"/> |
